# Supplementary material for: An integrated electrode based on nanoflakes of MoS2 on carbon cloth for enhanced lithium storage
Source: Royal Society of Chemistry journal article supplement (doi:10.1039/c9ra10756h), 2020-01-01
Supplement: c9ra10756h1.pdf [file c9ra10756h1.pdf]

## Supporting Information

---

**An integrated electrode based on nanoflakes of MoS<sub>2</sub> on carbon cloth for enhanced lithium storage**

*Yan Guo\**, *Shuang Li*, *Qiuyue Fang*, *Jialu Zuo*, *Ming Liu*, and *Jun Zhang\**

College of Chemistry and Chemical Engineering, Inner Mongolia University, Hohhot 010021, P. R. China.

E-mail: [guoyan@imu.edu.cn](mailto:guoyan@imu.edu.cn) (Y. Guo); [cejzhang@imu.edu.cn](mailto:cejzhang@imu.edu.cn) (J. Zhang)

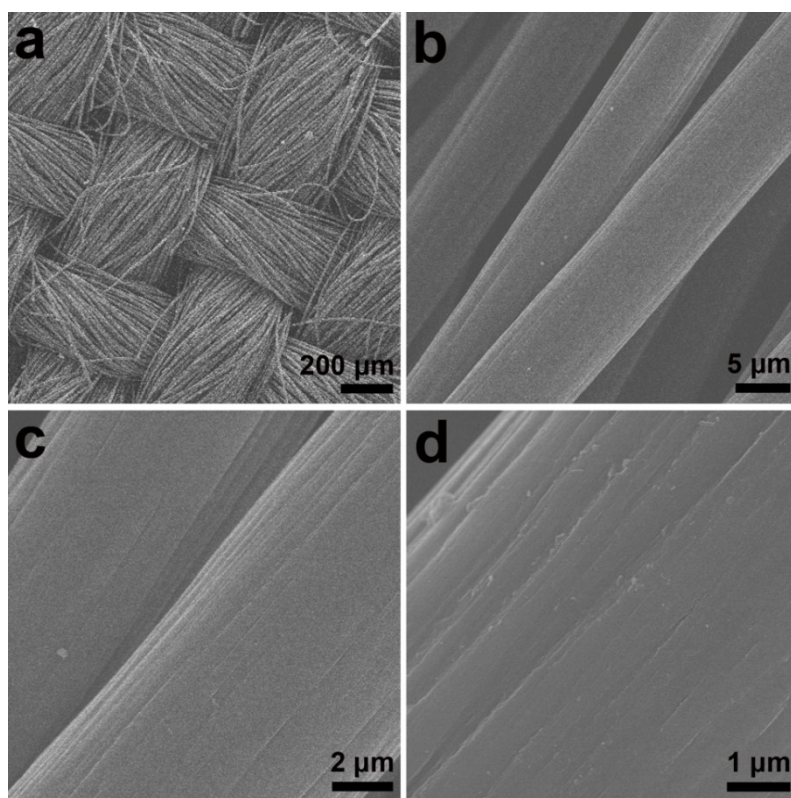

**Fig. S1.** FESEM images of CC.

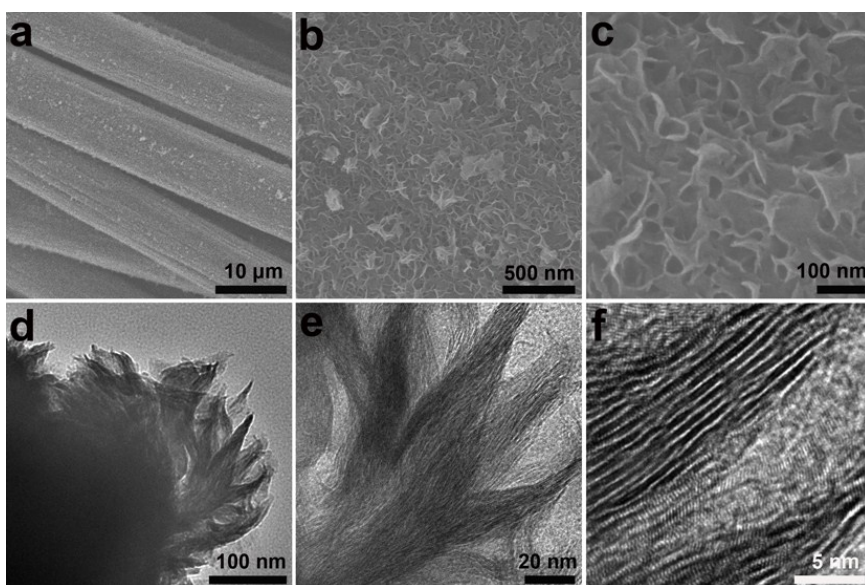

**Fig. S2.** (a-c) FESEM, (d-e) TEM and (f) HRTEM images of CC@MoS<sub>2</sub> precursor.

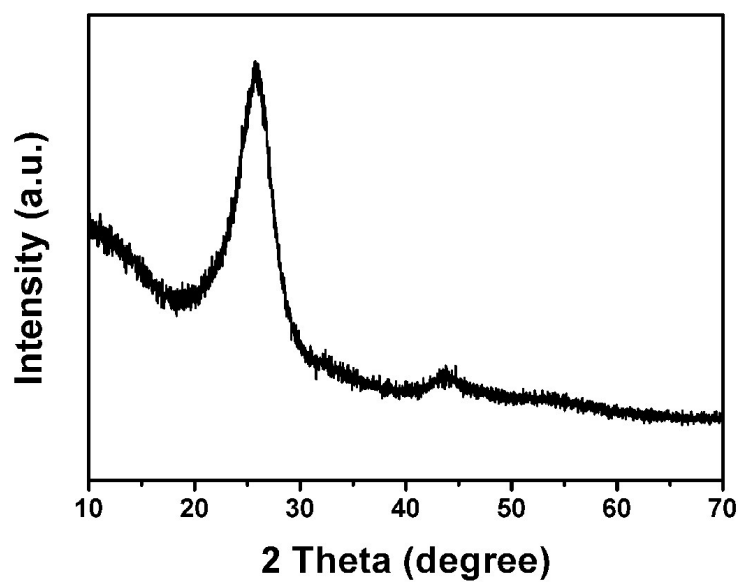

**Fig. S3.** XRD pattern of CC@MoS<sub>2</sub> precursor.

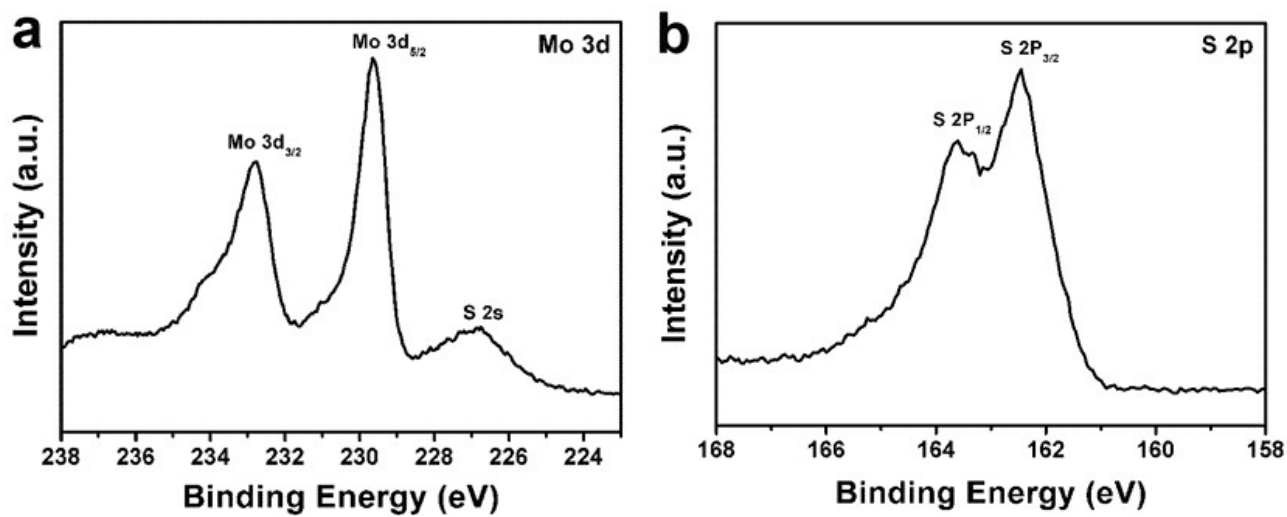

**Fig. S4.** High-resolution XPS spectra of: (a) Mo 3d, and (b) S 2p of CC@MoS<sub>2</sub> precursor.

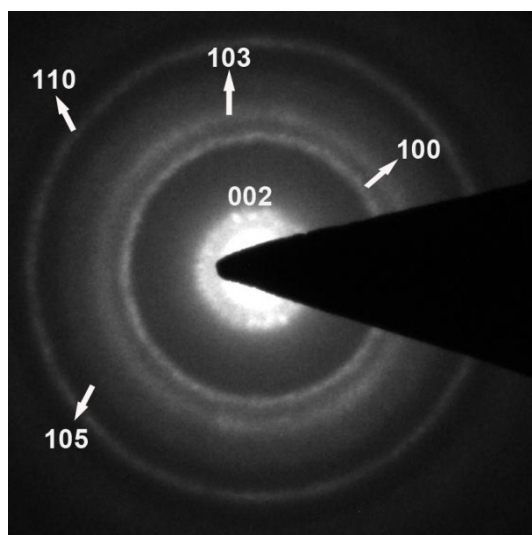

**Fig. S5.** The SAED pattern of CC@MoS<sub>2</sub>.

The SEAD pattern in Fig. S5 can be indexed to the hexagonal MoS<sub>2</sub> phase. Five diffraction rings can be indexed as the (002), (100), (103), (105) and (110) planes, respectively.

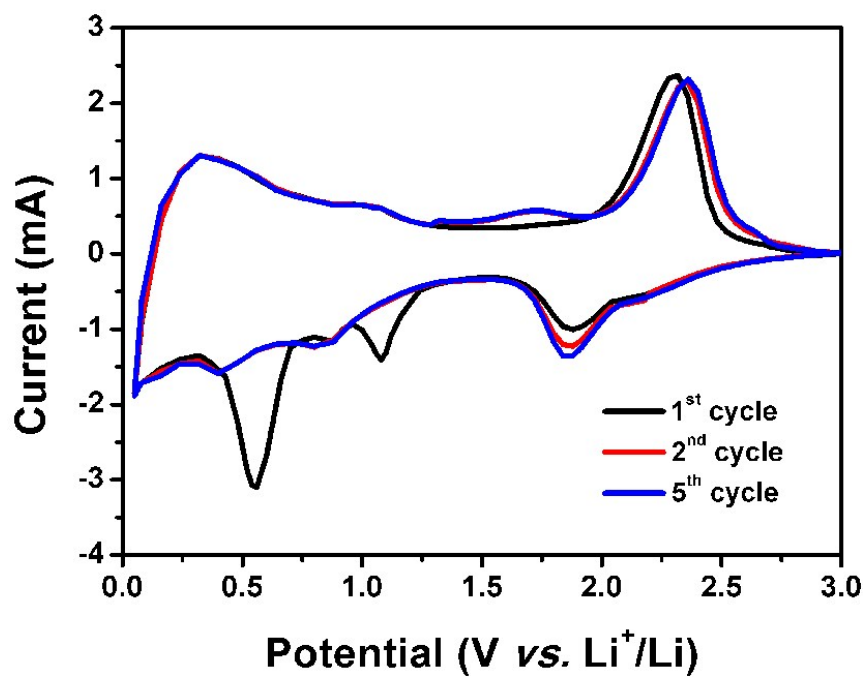

Fig. S6. CV curve of CC@MoS<sub>2</sub> electrode.

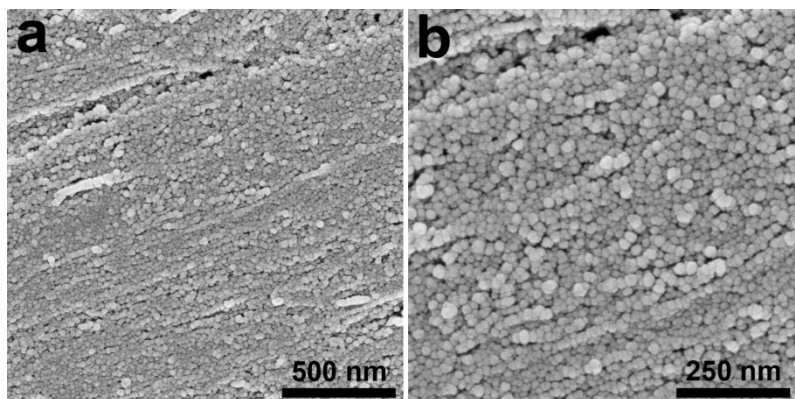

**Fig. S7.** FESEM images of CC@MoS<sub>2</sub> anode materials after cycling tests.
